# Supplementary material for: Degradation of Hybrid Drug Delivery Carriers with a Mineral Core and a Protein–Tannin Shell under Proteolytic Hydrolases
Source: MDPI journal article supplement (doi:10.3390/biomimetics7020061), 2022-05-12
Supplement: s1 [file s1]

## Supplementary Materials

# Degradation of Hybrid Drug Delivery Carriers with a Mineral Core and a Protein–Tannin Shell under Proteolytic Hydrolases

Polina A. Demina <sup>1</sup>, Mariia S. Saveleva <sup>1,\*</sup>, Roman A. Anisimov <sup>1</sup>, Ekaterina S. Prikhozhenko <sup>1</sup>, Denis V. Voronin <sup>1,2</sup>, Anatolii A. Abalymov <sup>1</sup>, Kirill A. Cherednichenko <sup>2</sup>, Olesya I. Timaeva <sup>3</sup>, and Maria V. Lomova <sup>1</sup>

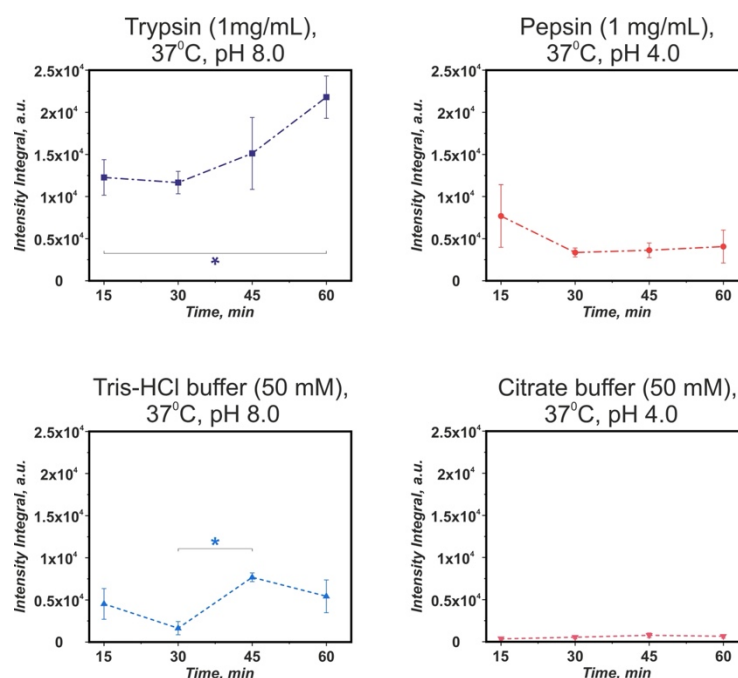

Figure S1. Emission intensity integrals in 772-804 nm range of BSA-Cy7 for each sample ( $\lambda_{\text{ex}} = 745$  nm) after different time of incubation in solutions. An asterisk (\*) indicates significant differences between specific data points. Statistical analysis was performed by ANOVA followed by the Tukey test ( $p < 0.05$ ).

Table S1. P-values for the emission intensity integrals data.

| Time points    | P-value       |        |                 |                |
|----------------|---------------|--------|-----------------|----------------|
|                | Trypsin       | Pepsin | Tris-HCl buffer | Citrate buffer |
| 15 min; 30 min | 0.6950        | 0.1164 | 0.2836          | 0.2348         |
| 30 min; 45 min | 0.2507        | 0.6885 | <b>0.0233*</b>  | 0.2838         |
| 45 min; 60 min | 0.0800        | 0.7379 | 0.3771          | 0.5757         |
| 15 min; 60 min | <b>0.0035</b> | 0.2085 | 0.5915          | 0.1185         |

\*Bold highlighted values have  $p < 0.05$ , and thus the changes are considered significant.
